# Supplementary material
Source: Springer Nature journal article supplement (https://www.springermedizin.de/resource/supplementary/12992_2006_28_MOESM1_ESM.pdf/9616296)

Northern Mariana Islands

Guam

Pacific Islands (Palau)

Federated States of Micronesia

Marshall Islands

Kosrae

Nauru

Kiribati

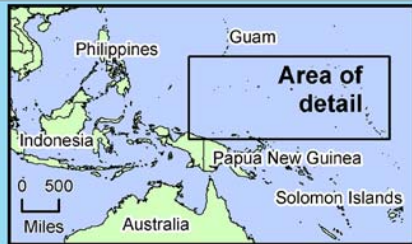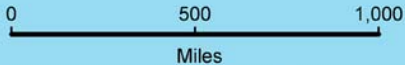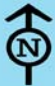

Supplement: MOESM1 [file 9616296]
